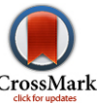

# Evaluation of the Short-Term Effects of Antimicrobial Stewardship in the Intensive Care Unit at a Tertiary Hospital in China

Dapeng Hou<sup>1\*</sup>, Qiushi Wang<sup>1</sup>, Cuihua Jiang<sup>1</sup>, Cui Tian<sup>1</sup>, Huaqing Li<sup>1</sup>, Bo Ji<sup>2\*</sup>

**1** Department of Intensive Care Unit, the Affiliated Hospital of Taishan Medical College, Taian, Shandong, China, **2** Department of Thoracic Surgery, the Affiliated Hospital of Taishan Medical College, Taian, Shandong, China

## Abstract

Antibiotic abuse can lead to antibiotic resistance, which is a severe problem in China. The purpose of this study is to evaluate the short-term effects of antimicrobial stewardship strategies, including formulary restriction, preauthorization, perioperative quinolone restriction, and control of total antibiotic consumption in the ICU at a tertiary hospital in China. After implementation of antimicrobial stewardship, the total antibiotic consumption in the ICU significantly decreased. The defined daily doses (DDDs) per 100 patient-days decreased from 197.65 to 143.41; however, the consumption of cephalosporins increased from 53.65 to 63.17 DDDs. Significant improvements in resistance to amikacin, gentamicin, ciprofloxacin, ofloxacin, ceftriaxone, ceftazidime, and piperacillin in Enterobacteriaceae and resistance to ceftazidime, imipenem, and meropenem in non-fermenting Gram-negative rods were observed. In addition, the initial use of no antibiotics or of a single antibiotic significantly increased ( $P < 0.001$ ) and the use of two antibiotics in combination significantly decreased ( $P < 0.001$ ). Our results demonstrate that implementation of antimicrobial stewardship in a short period in the ICU dramatically reduced antibiotic consumption and significantly improved antibiotic resistance, which leads to more reasonable antibiotic selections by ICU physicians.

**Citation:** Hou D, Wang Q, Jiang C, Tian C, Li H, et al. (2014) Evaluation of the Short-Term Effects of Antimicrobial Stewardship in the Intensive Care Unit at a Tertiary Hospital in China. PLoS ONE 9(7): e101447. doi:10.1371/journal.pone.0101447

**Editor:** Wenjun Li, National Center for Biotechnology Information (NCBI), United States of America

**Received:** February 13, 2014; **Accepted:** June 5, 2014; **Published:** July 7, 2014

**Copyright:** © 2014 Hou et al. This is an open-access article distributed under the terms of the Creative Commons Attribution License, which permits unrestricted use, distribution, and reproduction in any medium, provided the original author and source are credited.

**Funding:** These authors have no support or funding to report.

**Competing Interests:** The authors have declared that no competing interests exist.

\* Email: hdptyfy@163.com (DH); jibotyty@163.com (BJ)

## Introduction

Since antibiotics were first applied in clinical settings, more varieties have emerged, resulting in the recovery of numerous critically infected patients [1]. However, excessive antibiotic consumption has also caused increases in pharmaceutical fees, adverse drug events, and antibiotic resistance [2]. This problem is particularly serious in China because of the country's antibiotic prescription practices, strong incentives for overprescribing, and over-the-counter availability of antibiotics [3]. Comparison of the patterns of antibiotic resistance among bacteria of clinical relevance in China, Kuwait and the USA demonstrated that China had the highest level of antibiotic resistance and the most rapid growth rate of resistance among the three countries [4]. Such antibiotic overuse and the rapid growth rate of antibiotic resistance are particularly serious in intensive care units (ICUs) because patients in ICUs usually have serious health problems. An investigation demonstrated that in China's ICUs, the antibiotic resistance rate of common pathogens is increasing every year [5].

The Chinese government is aware of the harm caused by antibiotic overuse and has developed national policies to regulate its use. From April to August in 2011, according to the policy of the Ministry of Health of China and the Bureau of Health of Shandong Province, all public hospitals in Shandong province began to follow strict antimicrobial stewardship strategies. It has been reported that antimicrobial stewardship is an efficient way to

improve antibiotic resistance and to reduce patient cost by optimizing antimicrobial prescriptions [6]. Numerous studies have evaluated the long-term and short-term impacts of antimicrobial stewardship based on antibiotic consumption, antibiotic resistance, and clinical outcomes. In general, reasonable antimicrobial stewardship can significantly reduce the total consumption of antibiotics and improve antibiotic resistance, which can lead to better clinical outcomes [6–9]. China still lacks systematic studies on the short-term and long-term effects of antimicrobial stewardship. Evaluation of the effects of antimicrobial stewardship may provide useful information to further improve antimicrobial stewardship strategies. This study describes the implementation of new antimicrobial stewardship practices in our hospital and evaluates the short-term effects of antimicrobial stewardship strategies as implemented in the ICU.

## Materials and Methods

### Research ethics

This study was conducted with the permission and supervision of the Ethics Committee of the Affiliated Hospital of Taishan Medical College, Taishan, Shandong Province, China. Oral consent was obtained from patients and documented in our research notebook for use of their clinical records in this study. Written consent was not obtained because of illiteracy problem of many patients. The ethics committee mentioned above approved

the oral consent protocol. All patient records/information was anonymized prior to analysis.

### Antimicrobial stewardship strategies

The Affiliated Hospital of Taishan Medical College is a tertiary teaching hospital with 700 beds. The ICU of our hospital is comprehensive with 12 beds and annually handles 550 patients. From April to August in 2011, antimicrobial stewardship strategies were put into practice, including formulary restrictions, pre-authorization requirements, perioperative quinolone restriction and control of total antibiotic consumption. The specific strategies and classification standards are described in the flow-chart in Figure 1 and in Appendixes S1 and S2. We compared the data before and after implementation of the antimicrobial stewardship (the 'before' period was October 2010 to March 2011, and the 'after' period was October 2011 to March 2012).

### Data collection

To evaluate the effects of antimicrobial stewardship in antibiotic consumption, data on antibiotic resistance, clinical outcomes, demographic and clinical data of patients, antibacterial use density (AUD), antibiotic resistance level, and initial antibiotic selection were collected and compared before and after the implementation of antimicrobial stewardship.

Demographic and clinical data included age, gender, APACHE II score, primary (infectious or non-infectious) disease when admitted to the ICU, the application of antibiotics within the 30

days prior to the transfer, the application of glucocorticoid therapy within the 30 days prior to the transfer, whether the patient accepted the treatment of mechanical ventilation in the ICU, days of treatment with mechanical ventilation, length of ICU stay, death, and whether the death was correlated with infection. Previous application of glucocorticoid therapy referred to the application of glucocorticoids, oral or intravenous, within 30 days, excluding aerosol inhalation.

Antibiotic consumption was calculated based on the WHO standards [10], which is the cumulative antibacterial use density (AUD) expressed as DDDs per 100 patient-days. The number of DDDs per 100 patient days is often used as an indicator for the selection pressure exerted by antibiotics in the hospital setting. The results of microbial cultivation were summarized by WHONET. Isolated pathogenic strains were grouped into three categories: Enterobacteriaceae, non-fermenting Gram-negative rods, and Gram-positive cocci. All the isolates were identified by standard microbiological methods, and susceptibility testing was performed by the disk diffusion test according to the recommendations of the Clinical and Laboratory Standards Institute [11] and with Vitek II AST-No. 17 GNB cards (bioMerieux, Marcy l'Etoile, France). Duplicate isolates collected from the same patient within the same hospital stay were counted only once.

Data on antibiotic use before admission to the ICU were collected, including intravenous and oral antibiotic application 30 days before admission to the ICU, use, antibiotic varieties and how many varieties used. Statistics on the initial antibiotic use after

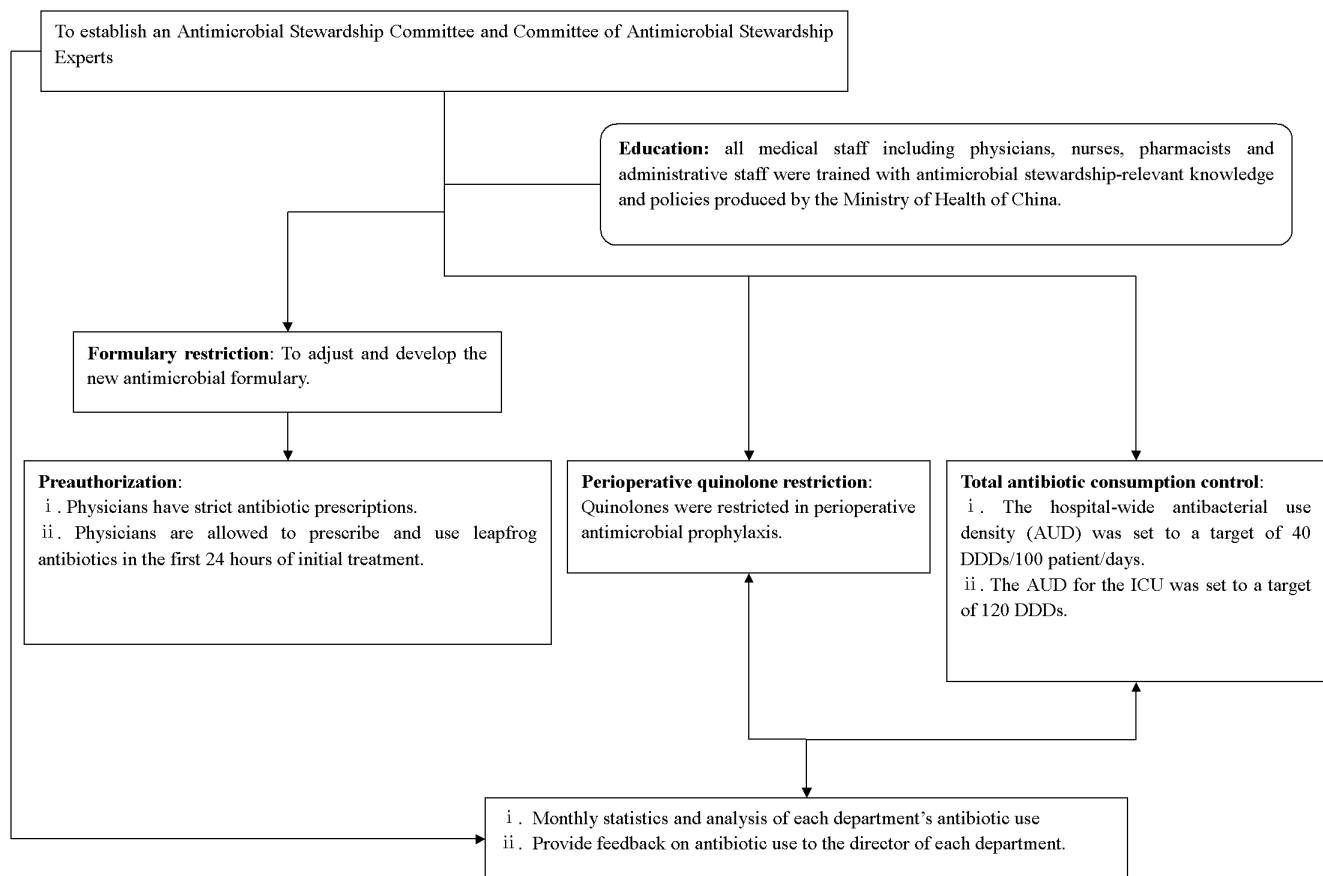

**Figure 1. Flow chart of antimicrobial stewardship strategies applied in the ICU at a tertiary hospital in China.** These strategies primarily included formulary restriction, preauthorization, perioperative quinolone restriction, and control of total antibiotic consumption.

doi:10.1371/journal.pone.0101447.g001

admission to the ICU were also collected, including whether used, the antibiotic varieties used, and whether monotherapy or combination therapy was used.

### Statistical analysis

Data were analyzed using SPSS 11.0. All tests were two-sided, and significance was defined as a  $P$ -value  $\leq 0.05$ . Categorical variables are presented as a percentage and were compared using  $\chi^2$  analysis. Continuous variables are presented as the mean  $\pm$  standard deviation and were compared using one-way ANOVA.

## Results

### General information

There was no significant difference in sex ratio, age, APACHE II score, primary disease, proportion of infectious diseases, and prior glucocorticoid use between, before, and after the implementation of antimicrobial stewardship. No significant differences in ICU length of stay, the number of days on mechanical ventilation, mortality, or infection-related mortality was observed between these two groups. However, we found a higher proportion of no antibiotic therapy or single antibiotic therapy in the 'after' period, which may be explained by the hospital-wide implementation of antimicrobial stewardship strategies (Table 1).

### Significant decrease of antibiotic consumption after the implementation of antimicrobial stewardship

Our studies demonstrated a significant decrease in the hospital-wide total antimicrobial consumption (from 69.69 DDDs to 50.76 DDDs, a decrease of 27.16%). Concomitantly, the ICU total antibiotic consumption also decreased significantly after imple-

mentation of the antimicrobial stewardship strategies. The DDDs per 100 patient-days decreased from 197.65 to 143.41, which is a decrease of 27.44%. The consumption of quinolones, imidazoles, other  $\beta$ -lactams, and macrolides decreased significantly. Particularly, the DDDs of quinolone per 100 patient-days decreased sharply from 49.82 to 7.74. The DDDs of glycopeptide and carbapenem did not decrease but increased slightly. Accompanied by the increase in the consumption of cephalosporins, the DDDs per 100 patient-days increased from 53.65 to 63.17, which is an increase of 17.74% (Table 2).

### Dramatic improvement of antibiotic resistance after the implementation of antimicrobial stewardship

In the ICU, antibiotic resistance for Gram-negative bacilli improved significantly after the implementation of antimicrobial stewardship strategies. The percentage of Enterobacteriaceae isolates with resistance to amikacin, gentamicin, ciprofloxacin, ofloxacin, ceftriaxone, ceftazidime and piperacillin noticeably decreased. In addition, the percentage of isolate resistance to ceftazidime, imipenem and meropenem also decreased for non-fermenting Gram-negative rods. The percentage of isolates with resistant Gram-positive cocci did not change significantly (Table 3).

### Selection of initial antibiotic use after the implementation of antimicrobial stewardship

The initial antibiotic selection was also influenced by the antimicrobial stewardship. After implementation of antimicrobial stewardship, the initial selection of no antibiotic or single antibiotic increased significantly (5.0% vs 2.3%, 78.9% vs 20.5%), and the initial selection of two antibiotics were significantly lower (16.1% vs 74.1%). In the 'before' period, between the infectious and the

**Table 1.** Comparison of demographic and clinical data of patients before and after antimicrobial stewardship.

| Characteristic                                         | Before (n = 259)  | After (n = 279)   | P     |
|--------------------------------------------------------|-------------------|-------------------|-------|
| Male/female                                            | 170/89            | 187/92            | 0.734 |
| Age                                                    | 53.10 $\pm$ 19.43 | 54.59 $\pm$ 18.07 | 0.357 |
| APACHE II score                                        | 21.46 $\pm$ 8.04  | 21.04 $\pm$ 9.14  | 0.578 |
| Primary diseases                                       |                   |                   | 0.998 |
| Medical diseases                                       | 84                | 90                |       |
| Surgical diseases                                      | 80                | 86                |       |
| Trauma                                                 | 95                | 103               |       |
| Infectious diseases/non-infectious                     | 50/209            | 44/235            | 0.281 |
| Transfer from Infectious department/General department | 106/153           | 139/140           | 0.038 |
| Antibiotic use before                                  |                   |                   | 0.011 |
| Non                                                    | 178(68.7%)        | 214(76.7%)        |       |
| Single                                                 | 33(12.7%)         | 39(14.0%)         |       |
| Two                                                    | 36(13.9%)         | 19(6.8%)          |       |
| Three                                                  | 11(4.2%)          | 4(1.4%)           |       |
| More than three                                        | 1(0.4%)           | 3(1.1%)           |       |
| Glucocorticoid use before                              | 19/240            | 19/260            | 0.812 |
| With or without ventilator application                 | 140/119           | 177/102           | 0.027 |
| Ventilator days                                        | 3.38 $\pm$ 3.54   | 3.30 $\pm$ 5.29   | 0.867 |
| ICU days (median)                                      | 2                 | 2                 | 0.148 |
| All-cause death/survival                               | 40/219            | 32/247            | 0.176 |
| Death associated with infection/others                 | 11/248            | 8/271             | 0.386 |

doi:10.1371/journal.pone.0101447.t001

**Table 2.** Changes of antimicrobial consumption (DDDs/100 patient/days) after the antimicrobial stewardship.

| Antibiotics       | ICU    |        |            | Hospital-wide |       |            |
|-------------------|--------|--------|------------|---------------|-------|------------|
|                   | Before | After  | Change (%) | Before        | After | Change (%) |
| Penicillins       | 2.72   | 0.27   | -90.07     | 3.37          | 1.58  | -53.12     |
| Cephalosporins    | 53.65  | 63.17  | +17.74     | 23.95         | 30.09 | +25.64     |
| Carbapenems       | 16.44  | 17.05  | +3.71      | 0.48          | 0.45  | -6.25      |
| Other B-lactams   | 10.11  | 0.59   | -94.16     | 12.29         | 3.75  | -69.49     |
| Aminoglycosides   | 0.47   | 0.00   | —          | 0.15          | 0.06  | -60.00     |
| Tetracyclines     | 28.63  | 29.76  | +3.95      | 0.85          | 0.81  | -4.71      |
| Macrolides        | 11.43  | 3.39   | -70.34     | 5.01          | 3.58  | -28.54     |
| Glycopeptides     | 3.63   | 3.73   | +2.75      | 0.11          | 0.09  | -18.18     |
| Quinolones        | 49.82  | 7.74   | -84.46     | 14.32         | 3.40  | -76.26     |
| Imidazoles        | 14.63  | 10.61  | -27.48     | 8.13          | 6.08  | -25.22     |
| Antifungal Agents | 6.01   | 6.96   | +15.81     | 0.43          | 0.34  | -20.94     |
| Others            | 0.11   | 0.14   | +27.27     | 0.60          | 0.53  | -11.67     |
| Total             | 197.65 | 143.41 | -27.44     | 69.69         | 50.76 | -27.16     |

doi:10.1371/journal.pone.0101447.t002

non-infectious group, there was no significant difference in initial selection concerning whether to use and how many varieties used ( $\chi^2 = 3.339$ ,  $P = 0.297$ ), whereas in the 'after' period, the initial selection between the two groups was significantly different ( $\chi^2 = 8.487$ ,  $P = 0.012$ ), with a higher proportion of no antibiotic and single antibiotic use (5.5% vs 2.3% and 81.3% vs 65.9%, respectively) and a lower proportion of two antibiotic use (13.2% vs 31.8%) in the non-infectious group (Table 4).

## Discussion

The extensive application of antibiotics in the ICU has received increasing attention. A survey in Germany, with 40 ICUs included, indicated that patients in the ICU consumed a considerable amount of antibiotics with an average consumption of 1351 DDDs/per 1,000 patient days [12]. The use of antibiotics cures many patients with serious infections and allows them to recover; however, it has also promoted the emergence and spread of multidrug-resistant bacteria [13]. Many ICU physicians and infection control experts have made attempts, including formulary restriction, preauthorization, antimicrobial cycling, de-escalation of therapy, and combination therapy to control drug resistance [7,14–16]; however, these studies have produced inconsistent results [9]. In this study, we found that both the hospital-wide AUD and the AUD of the ICU significantly decreased. The antibiotic resistance of Gram-negative bacillus, especially Enterobacteriaceae, reduced significantly after the implementation of antimicrobial stewardship. In addition, we also observed more reasonable initial antibiotic selections by ICU physicians. Our study further supports the nation-wide implementation of antimicrobial stewardship in China.

For antibiotic consumption in the ICU, the total DDDs dropped significantly from 197.65 to 143.4, which is a decrease of 27.44%. Of the total antibiotic consumption, quinolones, other  $\beta$ -lactams, and imidazoles decreased significantly, and the ratio of the initial use of antibiotics also declined. The consumption of a number of alternative antibiotics, including cephalosporins and non-controlled antibiotics increased because their prescriptions were loosely controlled; however, our results indicated that cephalosporin resistance did not increase, despite the increase of

cephalosporin consumption. In addition, Enterobacteriaceae exhibited a reduction in resistance to ceftriaxone and ceftazidime and non-fermenting Gram-negative rods exhibited a reduction in resistance to ceftazidime.

We presume that the decreased consumption of antibiotics and improvement in antibiotic resistance achieved from the antimicrobial stewardship were mainly attributed to the control of the total antibiotic consumption and to regional control. Although the targeted DDDs for the ICU (120 DDDs) were higher than for other departments, the Antimicrobial Stewardship Committee gave a monthly statistical analysis report to the director of the ICU, who was required to improve antibiotic control with the goal of progressively lowered use, especially when the AUD was higher. Such administrative pressure would ideally be transmitted to each ICU physician. ICU physicians would then have to implement the antimicrobial stewardship strategies strictly, so that the increase of alternative antibiotic consumption and related rise in resistance would not occur. In addition, at the same time, hospital-wide, regional and even national implementations of antimicrobial stewardship strategies are much more likely to have been the key to the positive results achieved. The majority of the ICU patients were transferred from other departments or other hospitals. Patients transferred from so-called infection departments that have heavy antibiotic use and high resistance rates accounted for 45.54% of individuals with infectious disease patients accounting for 37%. These patients might already have resistant strains before they are transferred to the ICU; therefore, if antimicrobial stewardship strategies are only implemented in the ICU, and not included in other departments, the effect of the implementation in the ICU would be seriously affected.

In this study, there was a significant difference ( $P = 0.011$ ) in the 'before' and 'after' periods of antibiotic use before admission to the ICU (Table 1). There was a higher proportion of no antibiotic and single antibiotic therapy before admission to the ICU in the 'after' period, indicating its synchronization with the hospital-wide decrease of antibacterial use. There were also relatively small decreases of antibiotic use density in the subgroup of critical patients who were most likely to be transferred to the ICU. As these patients had a lower probability of being exposed to a variety of antibiotics or strong antibiotic density before admission to the

**Table 3.** Changes of percentage of bacterial isolates with antibiotic resistance (%) after antimicrobial stewardship.

| Antibiotic              | Enterobacteriaceae |       |        | Non-fermenting Gram-negative rods |       |       | Gram-positive cocci |       |       |
|-------------------------|--------------------|-------|--------|-----------------------------------|-------|-------|---------------------|-------|-------|
|                         | Before             | After | P      | Before                            | After | P     | Before              | After | P     |
| Amikacin                | 82.6               | 44.7  | 0.004  | 88.6                              | 81.4  | 0.356 |                     |       |       |
| Gentamycin              | 91.3               | 39.5  | <0.001 |                                   |       |       | 90.9                | 100   | 1.000 |
| Ciprofloxacin           | 91.3               | 44.7  | <0.001 | 91.4                              | 84.7  | 0.525 | 90.9                | 88.9  | 1.000 |
| Ofloxacin               | 91.3               | 42.1  | <0.001 |                                   |       |       |                     |       |       |
| Ceftriaxone             | 95.7               | 50.0  | <0.001 |                                   |       |       |                     |       |       |
| Ceftazidime             | 78.3               | 39.5  | 0.003  | 85.7                              | 64.4  | 0.026 |                     |       |       |
| Cefepime                | 52.2               | 36.8  | 0.241  | 60.0                              | 52.5  | 0.482 |                     |       |       |
| Imipenem                | 4.3                | 0     | 0.377  | 85.7                              | 59.3  | 0.007 |                     |       |       |
| Piperacillin            | 87.0               | 57.9  | 0.018  | 80.0                              | 72.9  | 0.438 |                     |       |       |
| Ampicillin/Sulbactam    | 56.5               | 42.1  | 0.275  |                                   |       |       |                     |       |       |
| Tobramycin              |                    |       |        | 94.3                              | 79.7  | 0.054 |                     |       |       |
| Levofloxacin            |                    |       |        | 88.6                              | 81.4  | 0.356 |                     |       |       |
| Meropenem               |                    |       |        | 88.6                              | 62.7  | 0.007 |                     |       |       |
| Mino cycline            |                    |       |        | 11.4                              | 23.7  | 0.143 |                     |       |       |
| Piperacillin/Tazobactam |                    |       |        | 77.1                              | 66.1  | 0.258 |                     |       |       |
| Oxacillin               |                    |       |        |                                   |       |       | 100                 | 100   | ---   |
| Tetracycline            |                    |       |        |                                   |       |       | 100                 | 100   | ---   |
| Vancomycin              |                    |       |        |                                   |       |       | 0                   | 0     | ---   |

doi:10.1371/journal.pone.0101447.t003

**Table 4.** Comparison of the ICU physicians' initial antibiotic selection before and after antimicrobial stewardship.

| Combination therapy | Before No.(%) of patients (n = 259) | After No.(%) of patients (n = 279) | Before <sup>1</sup> No.(%) of patients |                          | After <sup>2</sup> No.(%) of patients |                          |
|---------------------|-------------------------------------|------------------------------------|----------------------------------------|--------------------------|---------------------------------------|--------------------------|
|                     |                                     |                                    | Infectious diseases (n = 50)           | Non-Infectious (n = 209) | Infectious diseases (n = 44)          | Non-Infectious (n = 235) |
| Unused              | 6(2.3%)                             | 14(5.0%)                           | 0(0%)                                  | 6(2.9%)                  | 1(2.3%)                               | 13(5.5%)                 |
| Single antibiotic   | 53(20.5%)                           | 220(78.9%)                         | 8(16.0%)                               | 45(21.5%)                | 29(65.9%)                             | 191(81.3%)               |
| Two antibiotics     | 192(74.1%)                          | 45(16.1%)                          | 39(78.0%)                              | 153(73.2%)               | 14(31.8%)                             | 31(13.2%)                |
| Three antibiotics   | 8(3.1%)                             | 0(0%)                              | 3(6.0%)                                | 5(2.4%)                  | 0(0%)                                 | 0(0%)                    |

Initial antibiotic combination therapy in 'before' and 'after' period:  $\chi^2 = 217.924$ ,  $P < 0.001$ .

<sup>1</sup>Before antimicrobial stewardship,  $\chi^2 = 3.339$ ,  $P = 0.297$ .

<sup>2</sup>After antimicrobial stewardship,  $\chi^2 = 8.487$ ,  $P = 0.012$ .

doi:10.1371/journal.pone.0101447.t004

ICU, the decline of past exposure may also be helpful in the decline of antibiotic resistance in the ICU.

We noted that compared with the 'before' period, the consumption of carbapenems did not decline; instead, an increase was seen in their use. Interestingly, there was a decline in the resistance to imipenem and meropenem for non-fermenting Gram-negative rods. This phenomenon may be associated with strict quinolone prescription regulations and the rigid decrease of quinolone use. Many studies have demonstrated that excessive quinolone use is an independent risk factor of *Pseudomonas aeruginosa* resistance to imipenem. By limiting the use of quinolone antibiotics, *P. aeruginosa* resistance to imipenem and meropenem can be reduced in addition to decreasing the second-generation carbapenem antibiotic selection pressure [17,18]. Preclinical studies have revealed that there may be a common pathway in the resistance mechanism of *P. aeruginosa* to quinolones and carbapenems, such as a loss or decrease in levels of the outer membrane porin protein, OprD, or the overexpression of the MexAB-OprM efflux system. Such mechanisms may explain why an improvement of quinolone resistance in *P. aeruginosa* was accompanied by an improvement of carbapenem resistance [19–21].

We noted that, in addition to the decrease of antibacterial use density and the improvement of resistance, the implementation of antimicrobial stewardship also had impacts on the antibiotic selections of ICU physicians [8]. In regards to the initial antibiotic selection after admission to the ICU, there was a significant difference between the 'before' and 'after' periods. Combinations of two antibiotics were more common in the 'before' period, whereas single antibiotic therapy was more common in the 'after' period. Implementation of antimicrobial stewardship strategies, including education and use restriction, led the ICU physicians to change their prescription habits, actively or passively, and made them more inclined to initially choose single antibiotic therapy. However, the change of the antibiotic selection tendency had no impact on the total mortality of ICU patients. On the other hand, before implementation of the antimicrobial stewardship strategies, the infectious status had little impact on the ICU physicians' selection of single, combination or no antibiotic therapy (Table 4). That is, in regards to antibiotic selection, ICU physicians may not use patient infectious status as the main consideration, which results in excessive antibiotic application. Such physician behavior was altered after the intervention and patient infectious status has been one of the critical factors for ICU physicians to consider

antibiotic selection (Table 4). An initial antibiotic combination therapy for patients with infectious diseases took over a relatively high proportion of the prescribed antibiotics, indicating more reasonable antibiotic therapy practices of ICU physicians after the intervention. In summary, antimicrobial stewardship led to reasonable antibiotic selections in the ICU, which can directly contribute to the reduction of antibiotic use and may also decrease rates of antibiotic resistance.

There are some limitations to this study. This was a passive intervention study with only a single-center and a small sample size. Encouragingly, 33 tertiary hospitals, including ours, have formed a collaborative network for monitoring ICU antimicrobial resistance. The effect of the implementation of antimicrobial stewardship strategies is now being analyzed under the assessment of this collaboration. In addition, the present study only investigated the short-term effects of antimicrobial stewardship but the long-term effects should also be considered in future studies.

In summary, implementation of antimicrobial stewardship strategies, including formulary restriction, preauthorization, restriction of perioperative antimicrobial prophylaxis, and control of total antibiotic consumption, significantly reduced antibiotic use in a relatively short period. The resistance of Gram-negative bacteria to some antibiotics was improved to some extent. Simultaneously, the selection of antibiotics in the ICU became more reasonable. Abuse of antibiotics and resulting antibiotic resistance has become a major clinical and public health problem in China. Our results further support the national implementation of antimicrobial stewardship strategies; however, the long-term effects of these strategies require continuous tracking, monitoring and assessment.

## Supporting Information

**Appendix S1** Antimicrobial Stewardship. (DOCX)

**Appendix S2** Antimicrobial Classification. (DOCX)

## Author Contributions

Conceived and designed the experiments: DH BJ. Performed the experiments: QW CJ. Analyzed the data: CT. Contributed reagents/materials/analysis tools: HL. Wrote the paper: DH BJ.

## References

1. Fridkin SK, Steward CD, Edwards JR, Pryor ER, McGowan JE Jr., et al. (1999) Surveillance of antimicrobial use and antimicrobial resistance in United States hospitals: project ICARE phase 2. Project Intensive Care Antimicrobial Resistance Epidemiology (ICARE) hospitals. *Clin Infect Dis* 29: 245–252.
2. Hidron AI, Edwards JR, Patel J, Horan TC, Sievert DM, et al. (2008) NHSN annual update: antimicrobial-resistant pathogens associated with healthcare-associated infections: annual summary of data reported to the National Healthcare Safety Network at the Centers for Disease Control and Prevention, 2006–2007. *Infect Control Hosp Epidemiol* 29: 996–1011.
3. Reynolds L, McKee M (2009) Factors influencing antibiotic prescribing in China: an exploratory analysis. *Health Policy* 90: 32–36.
4. Zhang R, Eggleston K, Rotimi V, Zeckhauser RJ (2006) Antibiotic resistance as a global threat: evidence from China, Kuwait and the United States. *Global Health* 2: 6.
5. Wang H, Chen M, China Nosocomial Pathogens Resistance Surveillance Study Group (2005) Surveillance for antimicrobial resistance among clinical isolates of gram-negative bacteria from intensive care unit patients in China, 1996 to 2002. *Diagn Microbiol Infect Dis* 51: 201–208.
6. MacDougall C, Polk RE (2005) Antimicrobial stewardship programs in health care systems. *Clin Microbiol Rev* 18: 638–656.
7. Bassetti M, Di Biagio A, Rebesco B, Cenderello G, Amalfitano ME, et al. (2000) Impact of an antimicrobial formulary and restriction policy in the largest hospital in Italy. *Int J Antimicrob Agents* 16: 295–299.
8. Belongia EA, Knobloch MJ, Kieke BA, Davis JP, Janette C, et al. (2005) Impact of statewide program to promote appropriate antimicrobial drug use. *Emerg Infect Dis* 11: 912–920.
9. Kaki R, Elligsen M, Walker S, Simor A, Palmay L, et al. (2011) Impact of antimicrobial stewardship in critical care: a systematic review. *J Antimicrob Chemother* 66: 1223–1230.
10. World Health Organization Collaborating Centre for Drug Statistics Methodology Web site. Available: <http://www.whocc.no/atcddd/>.
11. Clinical and Laboratory Standards Institute (2005) Performance standards for antimicrobial susceptibility testing. Fifteenth informational supplement. Wayne, PA.
12. Meyer E, Schwab F, Gastmeier P, Rueden H, Daschner FD (2006) Surveillance of antimicrobial use and antimicrobial resistance in German intensive care units (SARI): a summary of the data from 2001 through 2004. *Infection* 34: 303–309.
13. Armstrong GL, Conn LA, Pinner RW (1999) Trends in infectious disease mortality in the United States during the 20th century. *JAMA* 281: 61–66.
14. Ntagiopoulos PG, Paramythiotou E, Antoniadou A, Giamarellou H, Karabinis A (2007) Impact of an antibiotic restriction policy on the antibiotic resistance patterns of Gram-negative microorganisms in an Intensive Care Unit in Greece. *Int J Antimicrob Agents* 30: 360–365.
15. Brown EM, Nathwani D (2005) Antibiotic cycling or rotation: a systematic review of the evidence of efficacy. *J Antimicrob Chemother* 55: 6–9.
16. Bliziotis IA, Samonis G, Vardakas KZ, Chrysanthopoulou S, Falagas ME (2005) Effect of aminoglycoside and beta-lactam combination therapy versus beta-lactam monotherapy on the emergence of antimicrobial resistance: a meta-analysis of randomized, controlled trials. *Clin Infect Dis* 41: 149–158.
17. Mohr JF, Jones A, Ostrosky-Zeichner L, Wanger A, Tillotson G (2004) Associations between antibiotic use and changes in susceptibility patterns of *Pseudomonas aeruginosa* in a private, university-affiliated teaching hospital: an 8-year-experience: 1995–2002. *Int J Antimicrob Agents* 24: 346–351.
18. Cook PP, Das TD, Gooch M, Catrou PG (2008) Effect of a program to reduce hospital ciprofloxacin use on nosocomial *Pseudomonas aeruginosa* susceptibility to quinolones and other antimicrobial agents. *Infect Control Hosp Epidemiol* 29: 716–722.
19. Kohler T, Michea-Hamzhepour M, Epp SF, Pechere JC (1999) Carbapenem activities against *Pseudomonas aeruginosa*: respective contributions of OprD and efflux systems. *Antimicrob Agents Chemother* 43: 424–427.
20. Livermore DM (2002) Multiple mechanisms of antimicrobial resistance in *Pseudomonas aeruginosa*: our worst nightmare? *Clin Infect Dis* 34: 634–640.
21. Ochs MM, McCusker MP, Bains M, Hancock RE (1999) Negative regulation of the *Pseudomonas aeruginosa* outer membrane porin OprD selective for imipenem and basic amino acids. *Antimicrob Agents Chemother* 43: 1085–1090.
